# Supplementary material for: The photo-controlled polymerization-induced self-assembly and reorganization process for fabrication of polymeric nanomaterials
Source: Royal Society of Chemistry journal article supplement (doi:10.1039/c6qm00380j), 2017-01-01
Supplement: c6qm00380j1.pdf [file c6qm00380j1.pdf]

## Supporting Information

# Photo-Controlled Polymerization-Induced Self-Assembly and Reorganization Process for Fabrication of Polymeric Nanomaterials

*Jiemei Zhou, Chunyan Hong,\* Caiyuan Pan*

CAS Key Laboratory of Soft Matter Chemistry, Department of Polymer Science and  
Engineering, University of Science and Technology of China, Hefei, Anhui, 230026,  
P. R. China.

### AUTHOR INFORMATION

#### **Corresponding Author**

\* E-mail: hongcy@ustc.edu.cn.

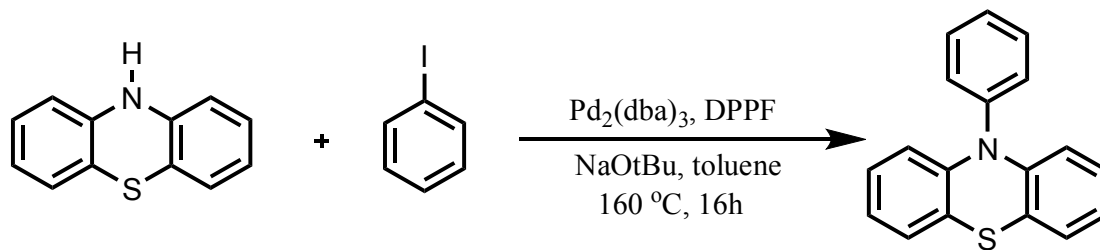

**Scheme S1.** Synthesis of PTH.

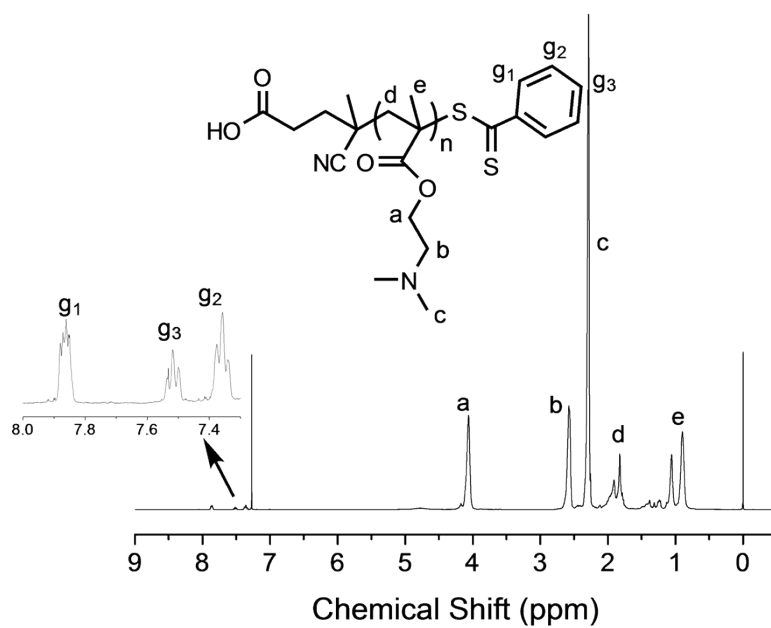

**Figure S1.** <sup>1</sup>H NMR spectrum of PDMAEMA-CPADB in CDCl<sub>3</sub>.

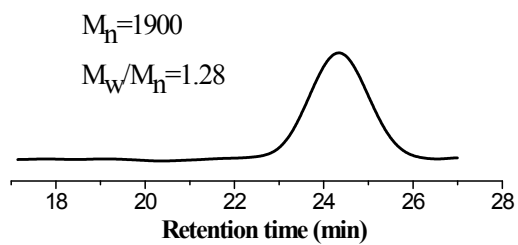

**Figure S2.** GPC trace of PDMAEMA-CPADB.

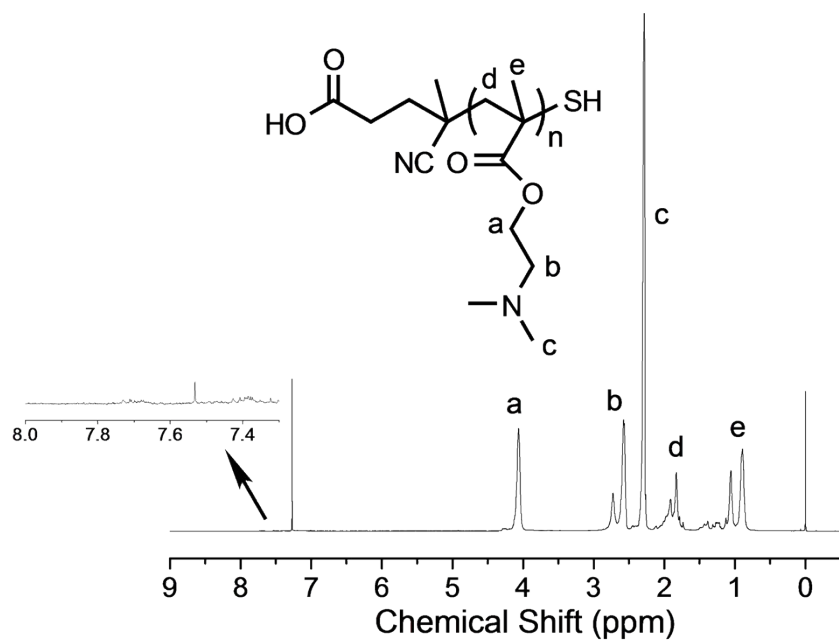

**Figure S3.** <sup>1</sup>H NMR spectrum of PDMAEMA-SH in CDCl<sub>3</sub>.

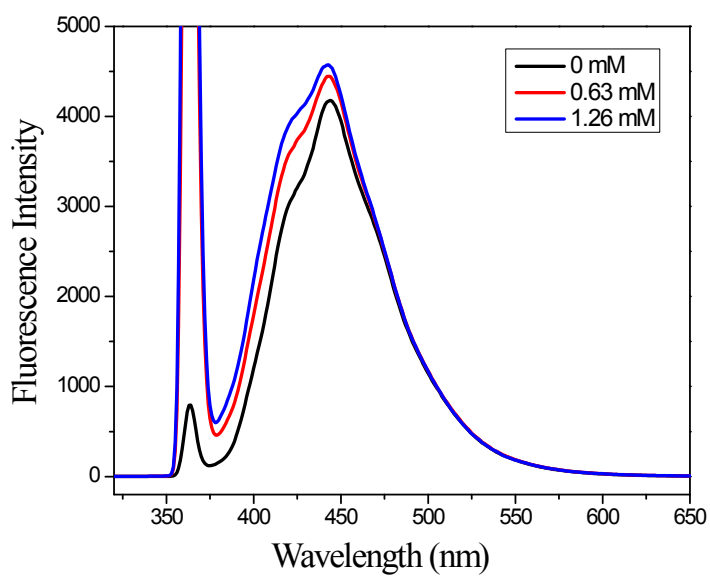

**Figure S4.** Fluorescence quenching study of solutions of PTH (0.669 mM) in ethanol with varying concentrations of PDMAEMA-SH.

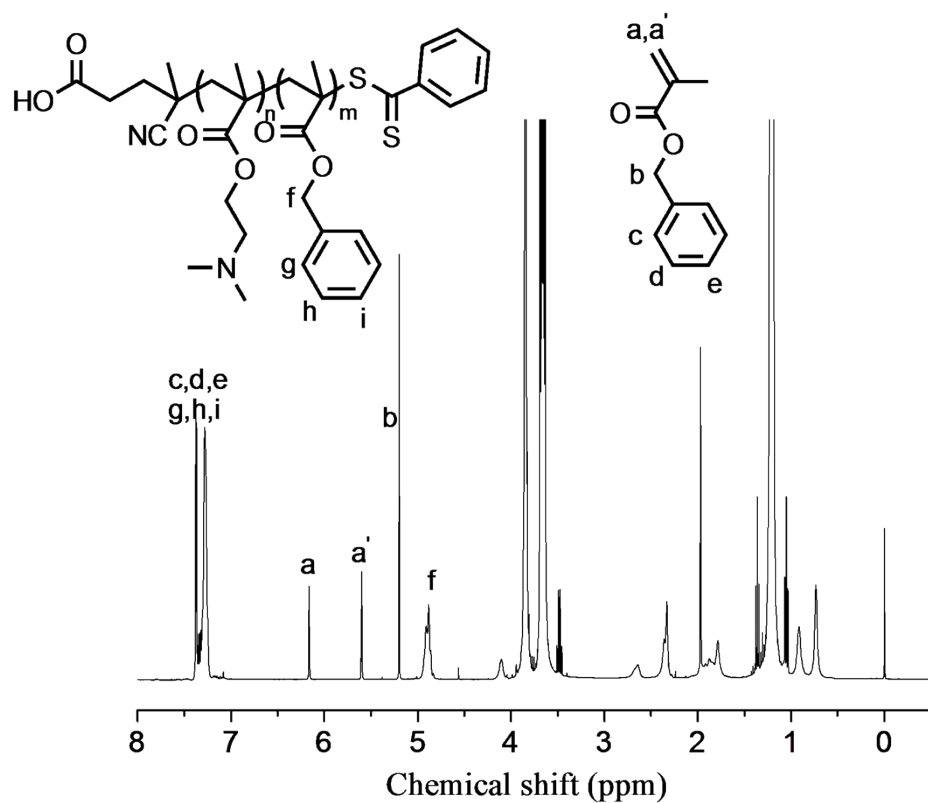

**Figure S5.** Typical  $^1\text{H}$  NMR spectrum of the PET-RAFT dispersion polymerization system of BzMA with PTH photoredox catalyst using PDMEAEM-CPADB as macro-CTA in  $\text{CDCl}_3$ .

$$\text{conversion}_{\text{BzMA}} = \frac{I_{4.87}}{I_{4.87} + I_{5.20}} \times 100\% \quad (\text{S1})$$

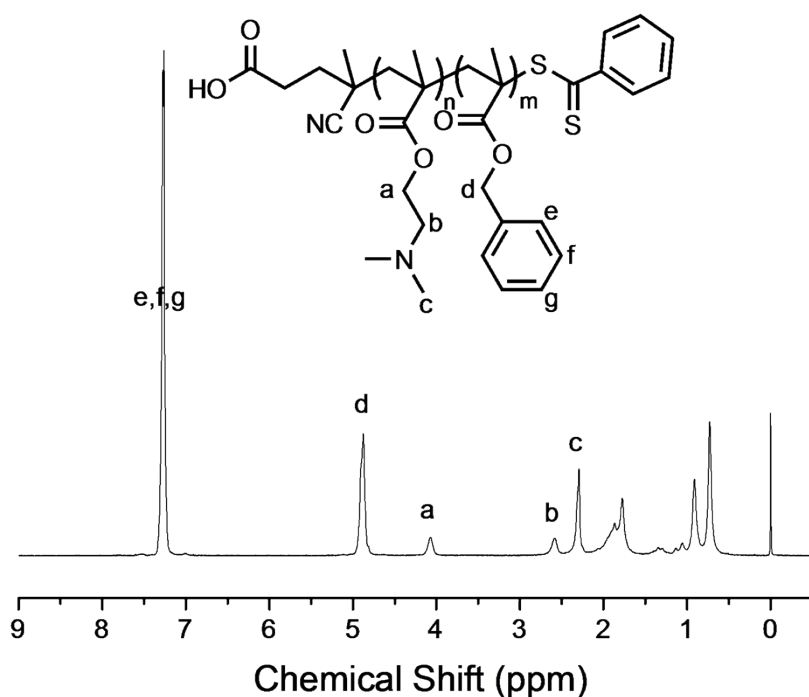

**Figure S6.**  $^1\text{H}$  NMR spectrum of PDMAEMA-*b*-PBzMA diblock copolymers synthesized using molar ratio of [PTH]/[PDMAEMA]=1/2.

**Table S1.** Characterization of PDMAEMA-*b*-PBzMA diblock copolymers synthesized with different polymerization times.

| Sample | Polymerization time (h) | Conv. <sup>a</sup> (%) | $M_n^b$ | $M_w/M_n^b$ |
|--------|-------------------------|------------------------|---------|-------------|
| 1      | 2.3                     | 5.2                    | 2300    | 1.09        |
| 2      | 5.3                     | 11.9                   | 4300    | 1.08        |
| 3      | 7.5                     | 19.0                   | 6700    | 1.04        |
| 4      | 10                      | 29.6                   | 10100   | 1.03        |
| 5      | 12.5                    | 39.4                   | 13500   | 1.03        |
| 6      | 15.2                    | 51.3                   | 17200   | 1.02        |
| 7      | 17.5                    | 61.8                   | 21300   | 1.04        |
| 8      | 20                      | 69.5                   | 24000   | 1.04        |
| 9      | 22.5                    | 80.2                   | 27000   | 1.05        |
| 10     | 25                      | 86.5                   | 31900   | 1.05        |
| 11     | 28                      | 89.4                   | 32000   | 1.06        |
| 12     | 33                      | 91.5                   | 32300   | 1.06        |

<sup>a</sup>The results were calculated based on  $^1\text{H}$  NMR spectra in  $\text{CDCl}_3$ . <sup>b</sup> The molecular weight and molecular weight distribution of di-block copolymers were determined by GPC measurements. The polymerization was conducted in ethanol with a molar ratio of [BzMA]/[PDMAEMA]/[PTH] = 1000/5/1 at 15% solids concentration.
